1 **Title:**

2 **aRgus: multilevel visualization of non-synonymous single nucleotide variants &**  
3 **advanced pathogenicity score modeling for genetic vulnerability assessment**

4 Authors:

5 Julian Schröter<sup>a,\*</sup>, Tal Dattner<sup>b,\*</sup>, Jennifer Hüllein<sup>c,\*</sup>, Alejandra Jayme<sup>d</sup>, Vincent Heuveline<sup>d</sup>,  
6 Georg F. Hoffmann<sup>b</sup>, Stefan Kölker<sup>b</sup>, Dominic Lenz<sup>b</sup>, Thomas Opladen<sup>b</sup>, Bernt Popp<sup>e</sup>,  
7 Christian P. Schaaf<sup>f</sup>, Christian Staufner<sup>b</sup>, Steffen Syrbe<sup>a</sup>, Sebastian Uhrig<sup>c</sup>, Daniel  
8 Hübschmann<sup>c,g,h,†</sup>, Heiko Brennenstuhl<sup>b,f,†,§</sup>

9 <sup>a</sup> *Division of Pediatric Epileptology, Center for Pediatrics and Adolescent Medicine,*  
10 *University Hospital Heidelberg, Im Neuenheimer Feld 430, D-69120 Heidelberg, Germany.*

11 <sup>b</sup> *Division of Neuropediatrics and Metabolic Medicine, Center for Pediatrics and Adolescent*  
12 *Medicine, University Hospital Heidelberg, Im Neuenheimer Feld 430, D-69120 Heidelberg,*  
13 *Germany.*

14 <sup>c</sup> *Computational Oncology, Molecular Precision Oncology Program, National Center for*  
15 *Tumor Diseases (NCT), German Cancer Research Center (DKFZ), Im Neuenheimer Feld*  
16 *460, D-69120 Heidelberg, Germany.*

17 <sup>d</sup> *Engineering Mathematics and Computing Lab (EMCL), Interdisciplinary Center for*  
18 *Scientific Computing (IWR), University of Heidelberg, Im Neuenheimer Feld 205, D-69120*  
19 *Heidelberg, Germany.*

20 <sup>e</sup> *Institute of Human Genetics, University Medical Center Leipzig, Philipp-Rosenthal-Str. 55*  
21 *(Haus W), D-04103 Leipzig, Germany.*

22 <sup>f</sup> *Institute of Human Genetics, University Hospital Heidelberg, Im Neuenheimer Feld 440, D-*  
23 *69120 Heidelberg, Germany.*

24 <sup>g</sup> *German Cancer Consortium (DKTK), Im Neuenheimer Feld 280, D-69120 Heidelberg,*  
25 *Germany.*

26 <sup>h</sup> *Heidelberg Institute for Stem Cell Technology and Experimental Medicine (HI-STEM), Im*  
27 *Neuenheimer Feld 280, D-69120 Heidelberg, Germany.*

28

29 § To whom correspondence should be addressed.

30 \* Equal contributors (first authors).

31 † Equal contributors (senior authors).

32

33 **Corresponding author:**

34 Heiko Brennenstuhl, MD, MBA  
35 Institute of Human Genetics  
36 University Hospital Heidelberg  
37 Im Neuenheimer Feld 440  
38 D-69120 Heidelberg  
39 Germany

40

41 Email: [heiko.brennenstuhl@med.uni-heidelberg.de](mailto:heiko.brennenstuhl@med.uni-heidelberg.de)

42 Phone: 06221 56-5081

43

## 1 **Abstract**

2 The widespread use of high-throughput sequencing techniques is leading to a rapidly  
3 increasing number of disease-associated variants of unknown significance and candidate  
4 genes. Integration of knowledge concerning their genetic, protein as well as functional and  
5 conservational aspects is necessary for an exhaustive assessment of their relevance and for  
6 prioritization of further clinical and functional studies investigating their role in human  
7 disease. In order to collect the necessary information, a multitude of different databases has to  
8 be accessed and data extraction from the original sources commonly is not user-friendly and  
9 requires advanced bioinformatics skills. This leads to a decreased data accessibility for a  
10 relevant number of potential users such as clinicians, geneticist, and clinical researchers. Here,  
11 we present aRgus (<https://argus.urz.uni-heidelberg.de/>), a standalone webtool for simple  
12 extraction and intuitive visualization of multi-layered gene, protein, variant, and variant effect  
13 prediction data. aRgus provides interactive exploitation of these data within seconds for any  
14 known gene of the human genome. In contrast to existing online platforms for compilation of  
15 variant data, aRgus complements visualization of chromosomal exon-intron structure and  
16 protein domain annotation with ClinVar and gnomAD variant distributions as well as  
17 position-specific variant effect prediction score modeling. aRgus thereby enables timely  
18 assessment of protein regions vulnerable to variation with single amino acid resolution and  
19 provides numerous applications in variant and protein domain interpretation as well as in the  
20 design of *in vitro* experiments.

## 21 **Keywords**

22 Pathogenicity scores; variant effect prediction; variant assessment; computational genetics

## 1 1. Introduction

2 In recent years, high-throughput sequencing methods have led to a tremendous increase in the  
3 extent of genetic and variant data related to human disease (1, 2). Upon identification of  
4 disease-associated genetic variants of unknown significance or in novel candidate genes, an  
5 investigator may need to integrate of multi-layered information concerning exon-intron  
6 structure, protein domain annotation, mutational constraint, as well as known variants present  
7 in patients and healthy individuals including their allele frequency. Additionally, the potential  
8 biological impact of variants on protein structure and function can be predicted using *in silico*  
9 pathogenicity scores that assign a numerical value to each amino acid substitution. This is  
10 particularly helpful for estimation of damaging variant effects when no functional *in vitro*  
11 data is available. This information has to be taken into consideration for variant interpretation  
12 according to the ACMG guidelines (3). Although the majority of the above-mentioned data  
13 are publicly accessible, they are only available in abstract, tabular form, stored in a multitude  
14 of different databases that have to be accessed individually, and their extraction, formatting,  
15 and analysis often require extensive bioinformatic capabilities. User-friendly platforms have  
16 previously been developed in order to facilitate access to genetic data from several resources  
17 but lack detailed integration and visualization of different pathogenicity scoring models (4-7).

18 Therefore, we developed aRgus (<https://argus.urz.uni-heidelberg.de/>) as a standalone  
19 webtool for user-friendly and intuitive compilation and visualization of complex data on  
20 genetic variants and *in silico* pathogenicity scores from the extensive databases Ensembl,  
21 Simple ClinVar, the Universal Protein Resource (UniProt), the Genome Aggregation  
22 Database (gnomAD), and dbNSFP (4, 5, 7-9). The Ensembl database contains comprehensive  
23 genomic information including chromosomal gene and transcript localization (4). Simple  
24 ClinVar is an interactive webtool using a custom algorithm to retrieve simplified summary  
25 statistics on variant and phenotype information from ClinVar, the largest archive of genetic  
26 variants associated with human disease (5, 10). UniProt represents the largest database for  
27 protein sequence and domain annotation data (7). The gnomAD database contains variant  
28 data from nearly 150,000 healthy individuals identified in exome and genome sequencing  
29 studies (8). The dbNSFP database represents a rich resource containing values of numerous *in*  
30 *silico* pathogenicity scores precalculated for all biologically possible non-synonymous single-  
31 nucleotide variants (nsSNVs) and related information, such as their gnomAD allele  
32 frequencies, that can be used for variant annotation (9). dbNSFP is implemented in several  
33 annotation tools such as ANNOVAR, VarSome, the UCSC Genome Browser, and the  
34 Ensembl Variant Effect Predictor and also offers an own application but can only be used for  
35 single queries or short lists of SNVs (6, 11-13).

36 In contrast, aRgus provides the synopsis of both variant and pathogenicity score data using an  
37 intuitive graphical user interface. aRgus allows display of exon-intron structure and protein  
38 domain annotation together with ClinVar and gnomAD variant distributions, a vivid  
39 visualization of pathogenicity score values and their statistical comparison in different variant  
40 groups, as well as an interactive table comprising ClinVar- and dbNSFP-derived variants.  
41 The use of aRgus enables identification of protein regions susceptible to missense variation  
42 up to single amino acid (AA) resolution and represents a powerful tool for enhanced  
43 inference-based variant interpretation.

## 1 2. Methods

### 2 2.1. Implementation

3 aRgus is implemented as a standalone application using the RStudio shiny framework  
4 (<https://shiny.rstudio.com/>) that allows translation of remote user operations into HTML code.  
5 Chromosomal coordinates and the UniProt ID of the transcript are retrieved through Ensembl  
6 (14) using the R package *AnnotationHub*. In order to achieve user-friendliness and to  
7 maximize the quality of data retrieval, the canonical transcript is automatically determined  
8 via query of the MANE transcript (15) or the highest quality APPRIS isoform (16). ClinVar  
9 variant and phenotype annotation is retrieved using a monthly updated dataset generated via  
10 the Simple ClinVar filter (5). Domain and region annotations of the corresponding protein are  
11 directly retrieved from UniProt using the R package *drawProteins* (7, 17). We use a tabix-  
12 indexed dbNSFP (v.4.3a) file to access up to 43 *in silico* pathogenicity scores for all possible  
13 nsSNVs and their gnomAD (exomes v.2.1, genomes v.3.0) allele counts (9). All databases are  
14 updated in regular intervals according to their respective release cycle. All visualizations are  
15 realized using the R library *ggplot2* v3.2.1 (18). Each plot (.svg/.png) and table (.csv/.xlsx)  
16 can be exported separately for offline data processing. The aRgus web server is compatible  
17 with all common web browser applications including versions for mobile devices. The source  
18 code is available at <https://github.com/huellejn/argus>. The application can be deployed locally  
19 using a Docker image.

### 20 2.2. Visualization of tabular pathogenicity score data

21 Theoretically, a gene transcript can mutate at any base position into three alternate bases  
22 leading to nsSNVs on the gene level as well as amino acid substitutions or truncations on the  
23 protein level, depending on the position within the base triplet. The damaging effect on  
24 protein function can be predicted *in silico* by an individual value of different pathogenicity  
25 scores assigned to each amino acid substitution (Fig. S1). Thus, all biologically possible  
26 nsSNVs can be simulated and result in several datapoints per amino acid position. In order to  
27 visualize these data intuitively and vividly, a dual approach was conducted: First, the  
28 *geom\_smooth()* function of the R package *ggplot2* was used to generate a polynomial  
29 regression of smoothed conditional means displayed by an approximation curve with 95%  
30 confidence interval. Local Polynomial Regression Fitting (*loess*, formula =  $y \sim x$ ) and a  
31 generalized additive model (*GAM*, formula =  $y \sim s(x, bs = "cs")$ ) are used for  $<$  and  $\geq$  1,000  
32 datapoints, respectively. Second, the arithmetic means of multiple pathogenicity score values  
33 at one amino acid position were calculated and visualized as a heat-strip color-coded by the  
34 predicted degree of the damaging effect on protein function (Fig. S1).

### 35 2.3. Statistics

36 All pathogenicity scores can be subjected to t-test comparisons between four pre-defined  
37 groups: 1.) variants stored in ClinVar and classified as pathogenic/likely pathogenic  
38 (*ClinVar\_pathogenic*), 2.) variants stored in ClinVar and classified as benign/likely benign  
39 (*ClinVar\_benign*), 3.) variants stored in gnomAD (*gnomAD*), and 4.) all biologically possible  
40 variants stored in dbNSFP (*InSilico*). Score value distributions within these groups are  
41 displayed as violin plots with integrated quartiles. The level of significance is shown as  
42 asterisks as follows: \* =  $p < 0.05$ , \*\* =  $p < 0.01$ , \*\*\* =  $p < 0.001$ .

43

### 1 3. Results

#### 2 3.1. Main user interface

3 aRgus provides intuitive use and accessibility. It can be accessed via all common browsers  
 4 and operating systems including mobile devices. On the aRgus main page, the user can enter  
 5 a gene of interest via its HGNC symbol (Fig. 1) The tool subsequently provides the MANE-  
 6 and APPRIS-curated canonical transcripts. The user can then choose from a panel of six plots  
 7 that can be displayed in a modular way in order to allow an individual compilation: 1.)  
 8 Unspliced transcript plot; 2.) protein plot; 3.) mutational constraint plots of disease-associated  
 9 and putatively benign ClinVar as well as 4.) tolerated gnomAD variants; 5.) a combined  
 10 pathogenicity score model including a polynomial fit and heat-strip with position-coded  
 11 annotation of score mean values; and 6.) a statistical comparison of score values of different  
 12 variant groups. Additionally, two interactive tables are available including a tab for all  
 13 ClinVar variants (*ClinVar*) and all biologically possible nsSNVs together with corresponding  
 14 score values derived from the dbNSFP database (*In silico scores*), respectively. Plots can be  
 15 exported in two file formats (.png/.svg) with user-specified aspect ratios. Tables can be  
 16 exported as .csv or .xlsx files for individual data storage and further offline data manipulation.

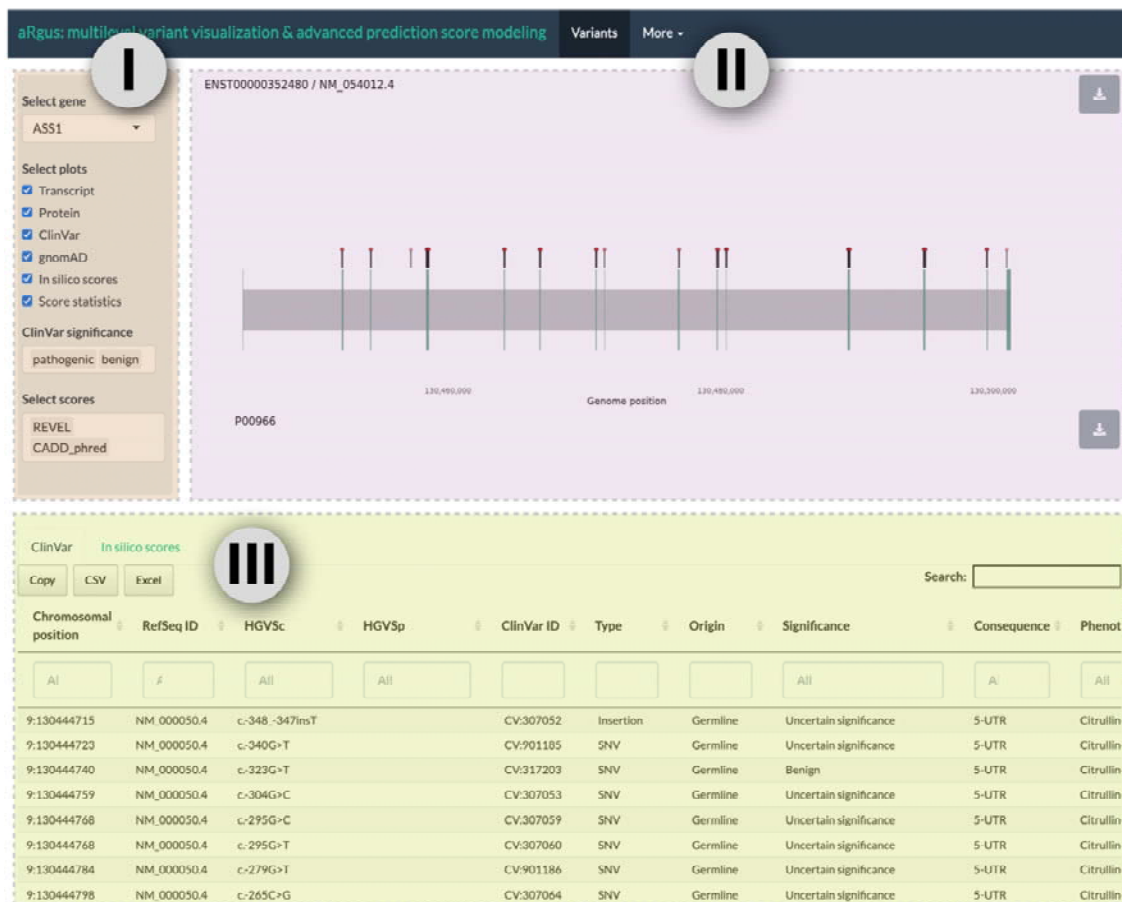

17 **Fig. 1: aRgus user interface.** I) Interactive input mask with control elements, II) dynamic  
 18 results area, III) tables from which variants can be selected for display with label.

19

## 1 **3.2. Applications**

### 2 **3.2.1. Unspliced transcript plot**

3 The unspliced transcript plot (UTP) displays the gene's scaled exon-intron structure from left  
4 to right starting with the first exon for improved readability regardless of the genomic  
5 localization on the forward or reverse strand. By default, pathogenic and likely pathogenic  
6 (P/LP) ClinVar variants are shown as lollipops which allows convenient visualization of  
7 intronic variants. In order to display the variant description, ClinVar and simulated dbNSFP  
8 variants can be manually selected in the respective tables. Figure 2A shows the UTP for the  
9 gene *ASS1*, encoding the enzyme argininosuccinate synthase (ASS), with selected P/LP  
10 ClinVar variants (red) and variants from the *In silico scores* table (gray), containing the  
11 dbNSFP-derived variants.

### 12 **3.2.2. Protein plot**

13 The primary structure of the resulting protein is visualized by the protein plot showing a  
14 linearized representation together with annotated domains retrieved from UniProt. As in the  
15 UTP, variants can be manually selected from the provided tables. Thereby, distribution of  
16 known and novel variants and their relation to protein domains/regions can easily be assessed.  
17 This versatile visualization provides useful insights for assessment of the pathophysiological  
18 relevance of potentially functionally relevant domains, given a gene scarcely associated with  
19 pathogenic variants. Figure 2B shows respective amino acid changes and protein domains of  
20 ASS.

### 21 **3.2.3. ClinVar and gnomAD mutational constraint plots**

22 Distributions of ClinVar and gnomAD variants with respect to their protein position and  
23 allele frequency are visualized by density and bar plots, respectively, facilitating assessment  
24 of a protein's mutational constraint. This includes sections of mutational hotspots, recurrent  
25 pathogenic and benign variants as well as the position-specific degree of tolerance towards  
26 missense variation. For more precise localization, ClinVar variants are additionally shown as  
27 vertical lines underneath the density curves (Fig. 2C). gnomAD variants are displayed in two  
28 separate logarithmic bar plots depending on their origin from the exomes (green) or genomes  
29 (blue) dataset (Fig. 2D). For ASS, ClinVar density curves reveal an accumulation of  
30 pathogenic variants in the region of AA 260-280 whereas gnomAD variants from both  
31 exomes and genomes show low population allele frequencies or are completely absent from  
32 the dataset (Figure 2E).

### 33 **3.2.4. In silico pathogenicity score model**

34 Pre-calculated pathogenicity score values of all biologically possible nsSNVs are retrieved  
35 from the dbNSFP database. In order to improve data accessibility, the resulting multiple data  
36 points per protein position are simplified and visualized using a polynomial regression model  
37 combined with a heat-strip scaled to the linear protein representation. Depending on the  
38 user's research question, the desired pathogenicity scoring model can immediately be  
39 selected from a list of up to 43 different scores. Plots for three different scores can be  
40 displayed simultaneously. This enables assessment of the predicted, position-specific impact  
41 of amino acid substitutions within the context of known protein domains and facilitates  
42 detection of regions of increased or decreased susceptibility to missense variation. Thereby,  
43 the functional impact of novel variants can be estimated and investigation of unknown

- 1 sections of predicted damaging variant effects can be addressed in order to formulate future
- 2 research hypotheses.

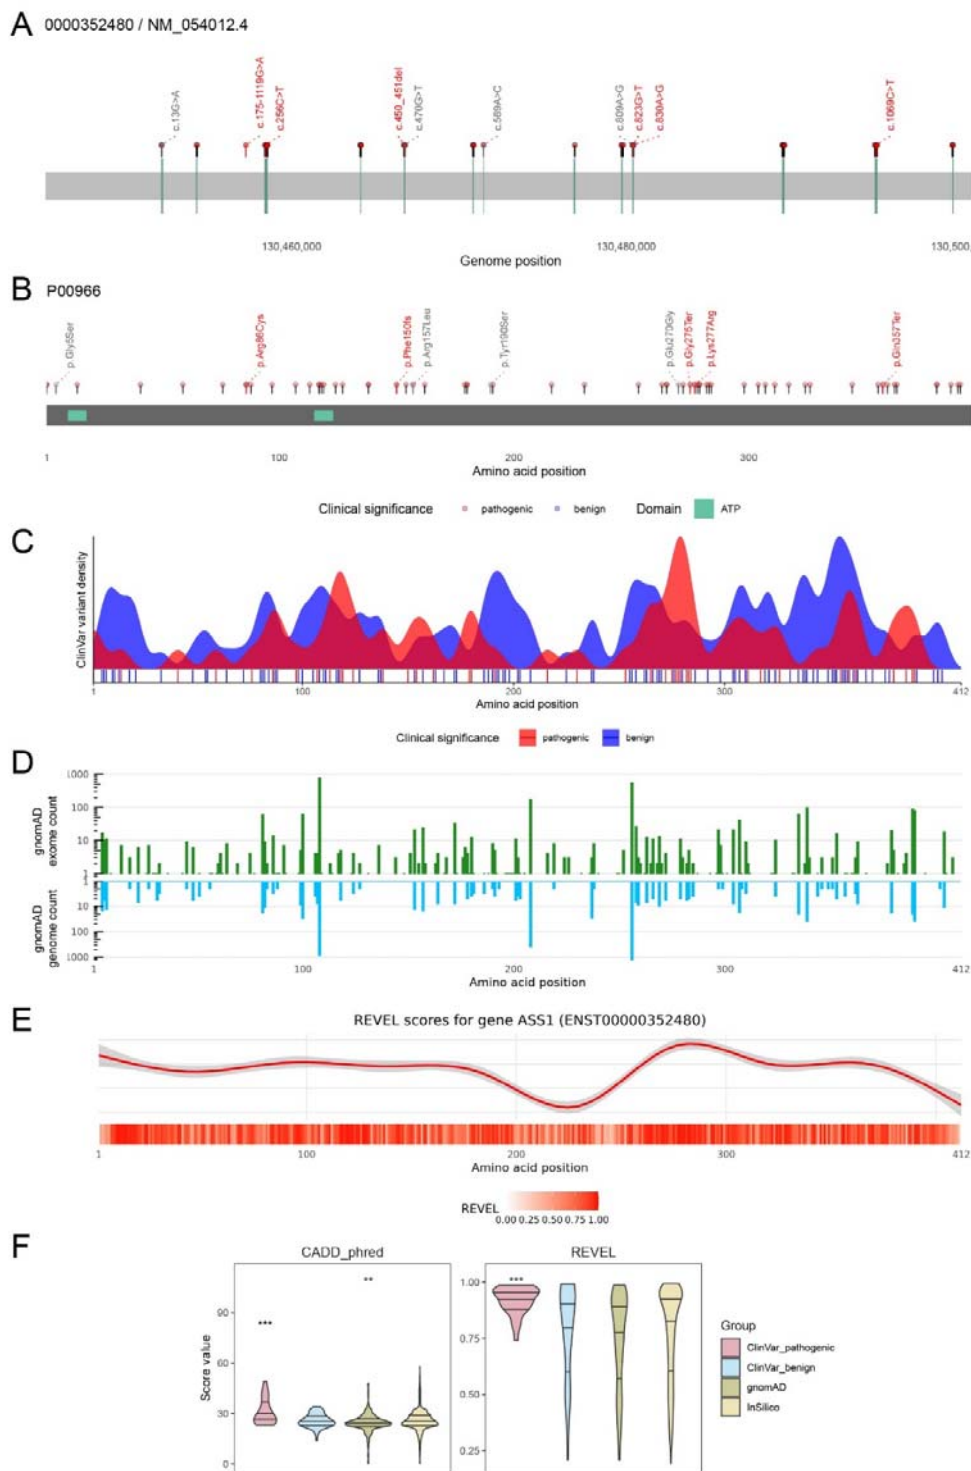

1 **Fig. 2: aRgus plots.** A) UTP of the gene *ASS1*. Labels show P/LP variants (red) and selected  
2 variants from the *in silico* tab (gray). B) Protein plot with AA exchanges corresponding to  
3 variants shown in A). C) Density plot of P/LP (red) and benign/likely benign (blue) Simple  
4 ClinVar variants. D) Logarithmic histogram of gnomAD exomes (green) and genomes (blue)  
5 variant allele frequencies. E) Polynomial regression of REVEL score (top) and heat-strip of  
6 mean score values (bottom). F) t-test group comparisons shown as violin plots with quartiles,  
7 \* ( $p$ -value < 0.05), \*\* ( $p$ -value < 0.01), and \*\*\* ( $p$ -value < 0.001).



1 In our practical example, regions with low (AA 200-250) and high (AA 270–300) values of  
2 the pathogenicity score *REVEL* correspond to local minima and maxima of the curve. The  
3 heat-strip representation displays mean score values allowing a more fine-granular resolution  
4 (Fig. 2E).

### 5 **3.2.5. Statistical comparisons**

6 Pathogenicity score values within the four variant groups *ClinVar\_pathogenic*,  
7 *ClinVar\_benign*, *gnomAD*, and *InSilico* are shown as violin plots with integrated quartiles  
8 (for definitions see Methods section 2.3). Additionally, score value distributions are  
9 statistically compared in order to assess the capability of the specific score to discriminate  
10 between variants of the different categories and hence its possible suitability for variant  
11 classification. For example, *ASSI* variants, that were annotated as P/LP, yield significantly  
12 higher *CADD* and *REVEL* score values than variants in the other three groups (Fig. 2F).

### 13 **3.2.6. Interactive table**

14 On the bottom side of the user interface, an interactive table, that remains sticky during  
15 scrolling, is available (Fig. 1). It comprises two tabs with all ClinVar variants as well as all  
16 simulated nsSNVs and corresponding pathogenicity score values. In order to provide  
17 interactivity to the user, selected variants are displayed in the UTP and protein plot. Both  
18 tables can be filtered, e.g., by variant type. Individual cells with score values in the *in silico*  
19 table are color-coded according to the predicted variant effect using score-specific cut-offs.

20

## 1 **4. Discussion**

2 The availability of databases with clinical and genetic information has never been greater  
3 than it is today. Scientific and medical advances, particularly in terms of sequencing and  
4 storage capabilities, will lead to an exponential growth of information in the coming decades.  
5 However, database queries often require bioinformatic tools, which ultimately limit the yield  
6 and usability of such. To enable clinicians, scientists, and other users without prior  
7 bioinformatic knowledge to explore rich yet complex datasets, user-friendly tools with an  
8 intuitive interface and the possibility to easily export data for further processing are needed.  
9 Web server applications allow users to make such queries regardless of the device and  
10 operating system. aRgus is therefore designed as a lightweight, multidimensional R/Shiny  
11 application to enable fast database queries.

12 aRgus uses minimal user input in the form of the gene name according to HUGO Gene  
13 Nomenclature Committee (HGNC) standard. aRgus can thus retrieve information of variable  
14 complexity on the localization and distribution of pathogenic variants at the chromosomal  
15 and protein levels, which can be used to explore biological and biochemical properties, such  
16 as mutational hotspots of pathogenic and benign variance within proteins. Visual linkages of  
17 pathogenic variation can be generated by annotating functionally important regions and  
18 domains from the UniProt database. aRgus provides simple means of displaying complex  
19 distributional information using complexity-reduced density representation that is quick and  
20 easy for the human eye to comprehend. The user is offered a wide range of possibilities to  
21 select relevant information to answer respective research questions.

22 By allowing simultaneous display of variants stored in gnomAD, the issue of survivorship  
23 bias, as a form of selection bias, can be overcome. Survivorship bias occurs in all clinical  
24 genetic databases and potentially leads to oversight of variants, that did not pass biological  
25 selection, by sole assessment of pathogenic variants from clinical databases such as ClinVar.  
26 This often results in misconceptions in the interpretation of mutational hotspots. The  
27 gnomAD database v2.1 contains over 125,000 exomes and 15,000 genomes from different  
28 populations. A comparison of benign variants derived from gnomAD and pathogenic variants  
29 listed in ClinVar and other genetic databases thus enables an improved assessment of putative  
30 pathogenic hotspots on the gene and protein level.

31 Beyond pure visualization of information on known pathogenic variants, a polynomial  
32 regression model and heatmap visualization offer an additional way of data exploitation  
33 which can be particularly advantageous for proteins that have previously been described to  
34 only a limited extent. These models overcome inaccessible, tabular data on pathogenicity  
35 scores and simplify the comprehensibility of visualized predicted variant effects up to single  
36 amino acid resolution. By annotation of all biologically possible missense variants using 36  
37 different pathogenicity scores, statements can be made about protein regions with high  
38 impact of amino acid exchanges without existing *in vitro* studies. Alternatively, resulting  
39 information can be used to plan functional *in vitro* studies, e.g., in order to investigate the  
40 functional relevance of regions in scarcely described proteins or with only limited data on  
41 pathogenic variants.

### 42 **4.1. Limitations**

43 Despite of its scientific value, aRgus is subject to some limitations. The quality of the  
44 visualizations and analyses produced by aRgus heavily depends on the quality of data  
45 available. According to our use cases, ClinVar data does not represent the entirety of all  
46 previously reported pathogenic variants. This is largely due to the lack of obligation of  
47 genetic laboratories to enter newly discovered disease-causing variants in centralized  
48 repositories. Extensive literature reviews are therefore necessary to obtain a comprehensive

1 picture of mutational distribution. This could be significantly improved by the addition of  
2 further, commercial databases such as HGMD or LOVD (19, 20). To enable users to  
3 visualize variants identified through their own literature research or genetic studies, variants  
4 can be selected from the dbNSFP-derived table of pathogenicity score values and are  
5 automatically highlighted in all plots.

## 6 **4.2. Conclusion**

7 Combining accessible and interactive visualizations of genetic and variant data with  
8 pathogenicity analysis in a synoptic, standalone tool, aRgus outstands existing applications  
9 for genetic data exploitation regarding output versatility and flexibility (5, 21). With each  
10 update of the databases connected to aRgus, the diversity and analysis capabilities of its  
11 visualizations and datasets will also improve. Thus, aRgus will provide useful and previously  
12 mostly inaccessible information to a broad usership with limited bioinformatics skills such as  
13 practicing clinicians, basic scientists, and geneticists, and thus be helpful to answer scientific  
14 questions.  
15

1 **5. Acknowledgments**

2 **5.1. Funding**

3 This work was supported by the NCT Molecular Precision Oncology Program and the  
4 Physician Scientist Program of the Medical Faculty of the University of Heidelberg (JS, HB).  
5 JS and SS received funding by the Dietmar Hopp Stiftung (grant 1DH1813319 to SS). BP  
6 was supported by the Deutsche Forschungsgemeinschaft (grant PO2366/2-1).

7 **5.2. Conflict of interest**

8 None declared.

9 **6. Author contributions**

10 JS, TD, and HB devised the project and main conceptual ideas and designed the study. JS,  
11 HB, JH, AJ, SU, and DH have designed and delivered the technical realization and  
12 implementation of aRgus. All authors were involved in the further development of aRgus  
13 during the development period through their intellectual input and the execution of targeted  
14 analyses. All authors provided critical feedback and helped shape the research, analysis, and  
15 manuscript.  
16

## 1 7. References

- 2 1. Goodwin S, McPherson JD, McCombie WR. Coming of age: ten years of next-  
3 generation sequencing technologies. *Nat Rev Genet.* 2016;17(6):333-51.
- 4 2. Kingsmore SF. 2022: a pivotal year for diagnosis and treatment of rare genetic  
5 diseases. *Cold Spring Harb Mol Case Stud.* 2022;8(2).
- 6 3. Richards S, Aziz N, Bale S, Bick D, Das S, Gastier-Foster J, et al. Standards and  
7 guidelines for the interpretation of sequence variants: a joint consensus recommendation of  
8 the American College of Medical Genetics and Genomics and the Association for Molecular  
9 Pathology. *Genet Med.* 2015;17(5):405-24.
- 10 4. Howe KL, Achuthan P, Allen J, Allen J, Alvarez-Jarreta J, Amode MR, et al.  
11 Ensembl 2021. *Nucleic Acids Res.* 2021;49(D1):D884-D91.
- 12 5. Perez-Palma E, Gramm M, Nurnberg P, May P, Lal D. Simple ClinVar: an interactive  
13 web server to explore and retrieve gene and disease variants aggregated in ClinVar database.  
14 *Nucleic Acids Res.* 2019;47(W1):W99-W105.
- 15 6. Kopanos C, Tsiolkas V, Kouris A, Chapple CE, Albarca Aguilera M, Meyer R, et al.  
16 VarSome: the human genomic variant search engine. *Bioinformatics.* 2019;35(11):1978-80.
- 17 7. UniProt C. UniProt: the universal protein knowledgebase in 2021. *Nucleic Acids Res.*  
18 2021;49(D1):D480-D9.
- 19 8. Karczewski KJ, Francioli LC, Tiao G, Cummings BB, Alfoldi J, Wang Q, et al. The  
20 mutational constraint spectrum quantified from variation in 141,456 humans. *Nature.*  
21 2020;581(7809):434-43.
- 22 9. Liu X, Li C, Mou C, Dong Y, Tu Y. dbNSFP v4: a comprehensive database of  
23 transcript-specific functional predictions and annotations for human nonsynonymous and  
24 splice-site SNVs. *Genome Med.* 2020;12(1):103.
- 25 10. Landrum MJ, Lee JM, Riley GR, Jang W, Rubinstein WS, Church DM, et al. ClinVar:  
26 public archive of relationships among sequence variation and human phenotype. *Nucleic*  
27 *Acids Res.* 2014;42(Database issue):D980-5.
- 28 11. Kent WJ, Sugnet CW, Furey TS, Roskin KM, Pringle TH, Zahler AM, et al. The  
29 human genome browser at UCSC. *Genome Res.* 2002;12(6):996-1006.
- 30 12. McLaren W, Gil L, Hunt SE, Riat HS, Ritchie GR, Thormann A, et al. The Ensembl  
31 Variant Effect Predictor. *Genome Biol.* 2016;17(1):122.
- 32 13. Wang K, Li M, Hakonarson H. ANNOVAR: functional annotation of genetic variants  
33 from high-throughput sequencing data. *Nucleic Acids Res.* 2010;38(16):e164.
- 34 14. Morgan M, Shepherd L. AnnotationHub: Client to access AnnotationHub resources.  
35 R package version 2.22.0. 2020.
- 36 15. Morales J, Pujar S, Loveland JE, Astashyn A, Bennett R, Berry A, et al. A joint NCBI  
37 and EMBL-EBI transcript set for clinical genomics and research. *Nature.*  
38 2022;604(7905):310-5.
- 39 16. Rodriguez JM, Rodriguez-Rivas J, Di Domenico T, Vazquez J, Valencia A, Tress ML.  
40 APPRIS 2017: principal isoforms for multiple gene sets. *Nucleic Acids Res.*  
41 2018;46(D1):D213-D7.
- 42 17. Brennan P. drawProteins: a Bioconductor/R package for reproducible and  
43 programmatic generation of protein schematics. *F1000Res.* 2018;7:1105.
- 44 18. Wickham H. *ggplot2 : Elegant Graphics for Data Analysis.* Cham: Springer  
45 International Publishing : Imprint: Springer,; 2016.
- 46 19. Fokkema IF, Taschner PE, Schaafsma GC, Celli J, Laros JF, den Dunnen JT. LOVD  
47 v.2.0: the next generation in gene variant databases. *Hum Mutat.* 2011;32(5):557-63.

- 1 20. Stenson PD, Mort M, Ball EV, Chapman M, Evans K, Azevedo L, et al. The Human  
2 Gene Mutation Database (HGMD((R))): optimizing its use in a clinical diagnostic or research  
3 setting. *Hum Genet.* 2020;139(10):1197-207.
- 4 21. Perez-Palma E, May P, Iqbal S, Niestroj LM, Du J, Heyne HO, et al. Identification of  
5 pathogenic variant enriched regions across genes and gene families. *Genome Res.*  
6 2020;30(1):62-71.

7  
8

1 **8. Supplementary files**

2 **8.1. Figure S1**

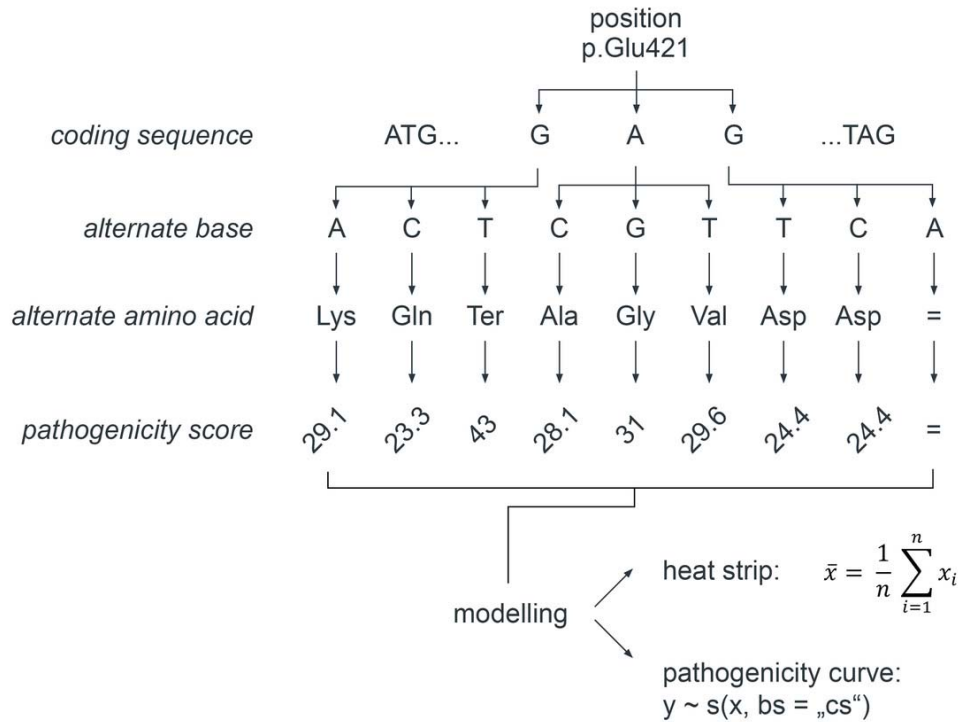

3

4 **Fig. S1: Schematic illustration of dbNSFP-derived variant simulation and aRgus-**  
 5 **mediated visualization.** Starting from the coding sequence of a gene transcript, any base at  
 6 any position is exchanged with its three non-synonymous alternate bases (top). Individual  
 7 pathogenicity score values (bottom) are assigned to the corresponding amino acid  
 8 substitutions (middle). In aRgus, the resulting tabular data is modelled and visualized using a  
 9 dual approach with a polynomial regression curve and a heat strip.

10

1 **8.2. Table S1. Pathogenicity scores available on aRgus.**

| Score             | Version             | Source                                                                                                                                                                                  |
|-------------------|---------------------|-----------------------------------------------------------------------------------------------------------------------------------------------------------------------------------------|
| REVEL             | Release May 3, 2021 | <a href="https://sites.google.com/site/revelgenomics/">https://sites.google.com/site/revelgenomics/</a>                                                                                 |
| CADD_phred        | v1.6                | <a href="http://cadd.gs.washington.edu/">http://cadd.gs.washington.edu/</a>                                                                                                             |
| SIFT              | ensembl 66          | <a href="https://sift.bii.a-star.edu.sg/www/history.html">https://sift.bii.a-star.edu.sg/www/history.html</a>                                                                           |
| SIFT4G            | v2.4                | <a href="http://sift.bii.a-star.edu.sg/sift4g/public//Homo_sapiens/">http://sift.bii.a-star.edu.sg/sift4g/public//Homo_sapiens/</a>                                                     |
| Polyphen HDIV     | v2.2.2              | <a href="http://genetics.bwh.harvard.edu/pph2/">http://genetics.bwh.harvard.edu/pph2/</a>                                                                                               |
| Polyphen HVAR     | v2.2.2              | <a href="http://genetics.bwh.harvard.edu/pph2/">http://genetics.bwh.harvard.edu/pph2/</a>                                                                                               |
| PROVEAN           | v1.1 ensembl 66     | <a href="http://provean.jcvi.org/index.php">http://provean.jcvi.org/index.php</a>                                                                                                       |
| M-CAP             | v1.3                | <a href="http://bejerano.stanford.edu/MCAP/">http://bejerano.stanford.edu/MCAP/</a>                                                                                                     |
| VEST4             | v4.0                | <a href="http://karchinlab.org/apps/appVest.html">http://karchinlab.org/apps/appVest.html</a>                                                                                           |
| FATHMM            | v2.3                | <a href="http://fathmm.biocompute.org.uk">http://fathmm.biocompute.org.uk</a>                                                                                                           |
| MetaSVM           | n/a                 | <a href="https://doi.org/10.1093/hmg/ddu733">doi: 10.1093/hmg/ddu733</a>                                                                                                                |
| MetaLR            | n/a                 | <a href="https://doi.org/10.1093/hmg/ddu733">doi: 10.1093/hmg/ddu733</a>                                                                                                                |
| ClinPred          | n/a                 | <a href="https://sites.google.com/site/clinpred/home">https://sites.google.com/site/clinpred/home</a>                                                                                   |
| MutationTaster    | v2                  | <a href="http://www.mutationtaster.org/">http://www.mutationtaster.org/</a>                                                                                                             |
| MutationAssessor  | Release 3           | <a href="http://mutationassessor.org/">http://mutationassessor.org/</a>                                                                                                                 |
| DANN              | n/a                 | <a href="https://cbel.ics.uci.edu/public_data/DANN/">https://cbel.ics.uci.edu/public_data/DANN/</a>                                                                                     |
| MutPred           | v1.2                | <a href="http://mutpred.mutdb.org/">http://mutpred.mutdb.org/</a>                                                                                                                       |
| MVP               | v1.0                | <a href="https://github.com/ShenLab/missense">https://github.com/ShenLab/missense</a>                                                                                                   |
| MPC               | Release 1           | <a href="ftp://ftp.broadinstitute.org/pub/ExAC_release/release1/regional_missense_constraint/">ftp://ftp.broadinstitute.org/pub/ExAC_release/release1/regional_missense_constraint/</a> |
| LRT               | Release 11/2009     | <a href="http://www.genetics.wustl.edu/jflab/lrt_query.html">http://www.genetics.wustl.edu/jflab/lrt_query.html</a>                                                                     |
| Primate AI        | n/a                 | <a href="https://github.com/Illumina/PrimateAI">https://github.com/Illumina/PrimateAI</a>                                                                                               |
| DEOGEN2           | n/a                 | <a href="https://deogen2.mutaframe.com/">https://deogen2.mutaframe.com/</a>                                                                                                             |
| BayesDel_addAF    | v1                  | <a href="http://fengbj-laboratory.org/BayesDel/BayesDel.html">http://fengbj-laboratory.org/BayesDel/BayesDel.html</a>                                                                   |
| BayesDel_noAF     | v1                  | <a href="http://fengbj-laboratory.org/BayesDel/BayesDel.html">http://fengbj-laboratory.org/BayesDel/BayesDel.html</a>                                                                   |
| fathmm.MKL_coding | v2.3                | <a href="http://fathmm.biocompute.org.uk/fathmmMKL.htm">http://fathmm.biocompute.org.uk/fathmmMKL.htm</a>                                                                               |
| fathmm.XF_coding  | v2.3                | <a href="http://fathmm.biocompute.org.uk/fathmm-xf/">http://fathmm.biocompute.org.uk/fathmm-xf/</a>                                                                                     |
| Eigen.raw         | v1.1                | <a href="http://www.columbia.edu/~ii2135/eigen.html">http://www.columbia.edu/~ii2135/eigen.html</a>                                                                                     |



|                            |                  |                                                                                                                                                                                       |
|----------------------------|------------------|---------------------------------------------------------------------------------------------------------------------------------------------------------------------------------------|
| Eigen.PC.raw               | v1.1             | <a href="http://www.columbia.edu/~jj2135/eigen.html">http://www.columbia.edu/~jj2135/eigen.html</a>                                                                                   |
| GenoCanyon                 | v1.0.3           | <a href="http://genocanyon.med.yale.edu/index.html">http://genocanyon.med.yale.edu/index.html</a>                                                                                     |
| integrated_fitCons         | v1.01            | <a href="http://compgen.bscb.cornell.edu/fitCons/">http://compgen.bscb.cornell.edu/fitCons/</a>                                                                                       |
| GM12878_fitCons            | v1.01            | <a href="http://compgen.bscb.cornell.edu/fitCons/">http://compgen.bscb.cornell.edu/fitCons/</a>                                                                                       |
| H1.hESC_fitCons            | v1.01            | <a href="http://compgen.bscb.cornell.edu/fitCons/">http://compgen.bscb.cornell.edu/fitCons/</a>                                                                                       |
| HUVEC_fitCons              | v1.01            | <a href="http://compgen.bscb.cornell.edu/fitCons/">http://compgen.bscb.cornell.edu/fitCons/</a>                                                                                       |
| LINSIGHT                   | n/a              | <a href="http://compgen.cshl.edu/~yihuang/LINSIGHT/">http://compgen.cshl.edu/~yihuang/LINSIGHT/</a>                                                                                   |
| GERP++_RS                  | n/a              | <a href="http://mendel.stanford.edu/SidowLab/downloads/gerp/">http://mendel.stanford.edu/SidowLab/downloads/gerp/</a>                                                                 |
| phyloP100way_vertibrate    | n/a              | <a href="http://hgdownload.soe.ucsc.edu/goldenPath/hg38/phyloP100way/">http://hgdownload.soe.ucsc.edu/goldenPath/hg38/phyloP100way/</a>                                               |
| phyloP30way_mammalian      | n/a              | <a href="http://hgdownload.soe.ucsc.edu/goldenPath/hg38/phyloP30way/">http://hgdownload.soe.ucsc.edu/goldenPath/hg38/phyloP30way/</a>                                                 |
| phyloP17way_primate        | n/a              | <a href="http://hgdownload.soe.ucsc.edu/goldenPath/hg38/phyloP17way/">http://hgdownload.soe.ucsc.edu/goldenPath/hg38/phyloP17way/</a>                                                 |
| phastCons100way_vertibrate | n/a              | <a href="http://hgdownload.soe.ucsc.edu/goldenPath/hg38/phastCons100way/">http://hgdownload.soe.ucsc.edu/goldenPath/hg38/phastCons100way/</a>                                         |
| phastCons30way_mammalian   | n/a              | <a href="http://hgdownload.soe.ucsc.edu/goldenPath/hg38/phastCons30way/">http://hgdownload.soe.ucsc.edu/goldenPath/hg38/phastCons30way/</a>                                           |
| phastCons17way_primate     | n/a              | <a href="http://hgdownload.soe.ucsc.edu/goldenPath/hg38/phastCons17way/">http://hgdownload.soe.ucsc.edu/goldenPath/hg38/phastCons17way/</a>                                           |
| SiPhy_29way_logOdds        | n/a              | <a href="https://www.broadinstitute.org/mammals-models/29-mammals-project-supplementary-info">https://www.broadinstitute.org/mammals-models/29-mammals-project-supplementary-info</a> |
| LIST.S2_score              | Release: 2019_10 | <a href="https://precomputed.list-s2.msl.ubc.ca/">https://precomputed.list-s2.msl.ubc.ca/</a>                                                                                         |

1 *n/a: not applicable.*
